# Supplementary material
Source: Springer Nature journal article supplement (https://www.springermedizin.de/resource/supplementary/12889_2010_2448_MOESM1_ESM.pdf/9485882)
Supplement: MOESM1 [file 9485882]

**French cardiologists**  
(both interventional  
and non-interventional)

**Exposed Group**

Eligible interventional  
cardiologists  
(both CIC\* and  
electrophysiologists )

**Unexposed Group**

Eligible non-  
interventional  
cardiologists

100 CIC participants

- general questionnaire;
- occupational questionnaire + exposure classification;

50 electrophysiologists  
participants

- general questionnaire;
- occupational questionnaire + exposure classification;
- eye examination

150 participants

- general questionnaire;
- eye examination

\*CIC: coronary interventional  
cardiologists

Matching by age, sex
